# Supplementary material
Source: PubMed Central journal article supplement (PMC2529090)
Supplement: 0801610105_0801610105SI.pdf [file 0801610105_0801610105SI.pdf]

# Supporting Information

Zhang *et al.* 10.1073/pnas.0801610105

## SI Text

### Supplemental Methods

**Karyotypic Analysis.** The cultures were harvested and G banded by use of standard protocols. Clonal chromosomal abnormalities identified by G banding were described according to the International Committee on Standard Genetic Nomenclature for MICE (2005). For karyotype analysis using G-banding, 40–85 metaphases from exponentially growing cells were examined using a computer-assisted program (Applied Imaging). Chromosome numbers for each metaphase was counted and frequency of occurrence in percent was calculated.

**Spectral Karyotyping (SKY).** The mixture of mouse chromosome paints was obtained from Applied Spectral Imaging (ASI). Hybridization and detection were carried out according to the

manufacturer's protocol. Chromosomes were counterstained with DAPI. For each case, a minimum of 10 metaphase cells was analyzed by SKY (tumor 305, 311, 1979, and 1980). Images were acquired with a SD200 Spectra cube (ASI) mounted on a Zeiss Axioplan II microscope using a custom designed optical filter (SKY-1) (Chroma Technology), and analyzed using SKY View 1.2 software (ASI).

**Comparative Genomic Hybridization (CGH).** High-molecular-weight DNA was extracted from tumor tissue (305, 311) and normal placenta by standard methods and subjected to CGH according to the previously published method with some modifications [Kallioniemi A, *et al.* (1992) Comparative genomic hybridization for molecular cytogenetic analysis of solid tumors. *Science* 258:818–8211]. The metaphase preparations were captured and processed by use of QUIPS software (Applied Imaging).

**A**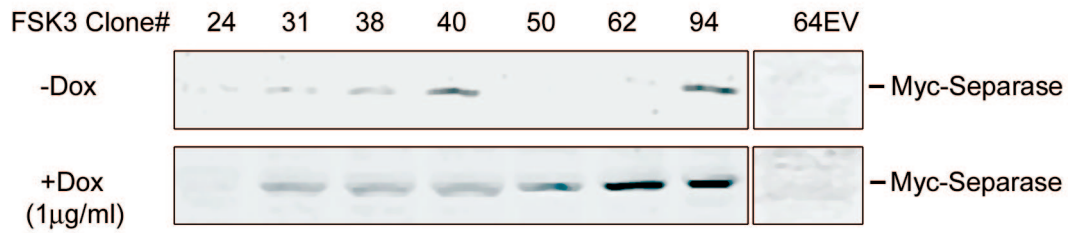**B**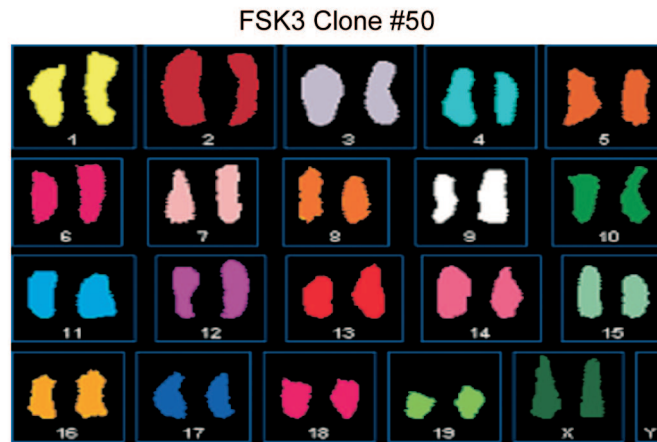

**Fig. S1.** (A) Western blot analysis of mSeparase protein in Tet-inducible FSK3 mouse mammary epithelial cell clones. Conditional expression of myc-epitope tagged mSeparase protein was examined in the presence (+Dox) and absence (-Dox) of 1  $\mu$ g/ml of doxycycline. Clone #64EV is an empty vector clone used as a negative control. Myc-mSeparase protein was detected using 9E10 monoclonal antibody. (B) SKY analysis of FSK3 Clone #50 at passage 14 before Separase induction ( $n = 10$ ), showing a representative classified colored karyotype with normal diploid chromosome.



**Table S1. Oncogenic activity of Separase *in vivo***

| Clone no.      | Induced | Not induced | Tumor appearance (week) | Tumor ID | Modal* chromosome number with range |
|----------------|---------|-------------|-------------------------|----------|-------------------------------------|
| 50             | 5/6     | 0/6         | 3–4                     | 305      | 42 (39–83)                          |
| 62             | 5/6     | 0/6         | 3–4                     | 311      | 41 (37–81)                          |
| 64EV (control) | 0/6     | 0/6         | -                       |          | 40 (40–80)                          |

Formation of mammary tumors within 3–4 weeks of transplant. Separase was induced for a period of 3 weeks by feeding the mice with 1 mg of doxycycline per liter of drinking water.

\*Most common chromosome number.

**Table S2. Pathological characteristics of the breast tissue samples used in Fig. 5**

| Sample | Diagnosis                       |           |          | Sample | Diagnosis                     |                          |         |
|--------|---------------------------------|-----------|----------|--------|-------------------------------|--------------------------|---------|
|        | Primary                         | Secondary | Type     |        | Primary                       | Secondary                | Type    |
| 1N     |                                 |           | N-Normal | 11     | Infiltrating ductal carcinoma | Carcinoma                | T-tumor |
| 1T     | Infiltrating ductal carcinoma I | Carcinoma | T-tumor  | 12     | signet ring                   |                          | T-tumor |
| 2N     |                                 |           | N-Normal | 13     | n/a                           | Carcinoma                | T-tumor |
| 2T     | Infiltrating ductal carcinoma   | Carcinoma | T-tumor  | 14     | n/a                           | Carcinoma                | T-tumor |
| 3N     |                                 |           | N-Normal | 15     | adeno                         | Carcinoma                | T-tumor |
| 3T     | Infiltrating ductal carcinoma   | Carcinoma | T-tumor  | 16     | n/a                           | Carcinoma                | T-tumor |
| 4N     |                                 |           | N-Normal | 17     | Infiltrating ductal carcinoma | Carcinoma                | T-tumor |
| 4T     | Infiltrating ductal carcinoma   | Carcinoma | T-tumor  | 18     | Infiltrating ductal carcinoma | Carcinoma                | T-tumor |
| 5N     |                                 |           | N-Normal | 19     | Infiltrating ductal carcinoma | Carcinoma                | T-tumor |
| 5T     | Infiltrating ductal carcinoma   | Carcinoma | T-tumor  | 20     | Infiltrating ductal carcinoma | Carcinoma                | T-tumor |
| 6N     |                                 |           | N-Normal | 21     | Infiltrating ductal carcinoma | Carcinoma                | T-tumor |
| 6T     |                                 | Carcinoma | T-tumor  | 22     | n/a                           | carcinoma                | T-tumor |
| 7N     |                                 |           | N-Normal | 23     | n/a                           | sarcoma                  | T-tumor |
| 7T     |                                 | Carcinoma | T-tumor  | 24     | Infiltrating ductal carcinoma | Carcinoma                | T-tumor |
| 8N     |                                 |           | N-Normal | 25     | sarcomatoid                   |                          | T-tumor |
| 8T     |                                 | Carcinoma | T-tumor  | 26*    | Infiltrating ductal carcinoma | Carcinoma                | T-tumor |
| 9N     |                                 |           | N-Normal | 27*    | Infiltrating ductal carcinoma | Ductal carcinoma in situ | T-tumor |
| 9T     |                                 | Carcinoma | T-tumor  | 28*    | Infiltrating ductal carcinoma | Carcinoma                | T-tumor |
| 10N    |                                 |           | N-Normal | 29*    | Infiltrating ductal carcinoma | Carcinoma                | T-tumor |
| 10T    |                                 | Carcinoma | T-tumor  | 30*    | Infiltrating ductal carcinoma | Carcinoma                | T-tumor |

\*Samples obtained from the Lester and Sue Smith Breast Center at Baylor College of Medicine. The rest of the samples are from the M. D. Anderson Cancer Center tissue repository (provided by Adel K. El-Naggar).
